# Supplementary material for: Mechanism of Faster CH4 Bubble Growth Under Surface Waves in Muddy Aquatic Sediments: Effects of Wave Amplitude, Period, and Water Depth
Source: Frontiers journal article supplement (doi:10.3389/feart.2022.833918), 2022-03-17
Supplement: Presentation_1.pdf [file Presentation_1.pdf]

## Supplementary Material

**Table S1:** Model equations solved in simulations (Katsman et al., 2013; Katsman, 2015)

| Equation                                                                                  | Formulation                                                                                                             |
|-------------------------------------------------------------------------------------------|-------------------------------------------------------------------------------------------------------------------------|
| Force Equilibrium Equation                                                                | $-\nabla \cdot \sigma = \vec{F}_g$ (S1)                                                                                 |
| Solute Conservation Equation                                                              | $\frac{\partial C_{CH_4}(aq)}{\partial t} + \nabla \cdot [-D \nabla C_{CH_4}(aq)] = 0$ (S2)                             |
| Conservation of gaseous CH <sub>4</sub> inside the bubble                                 | $\frac{\partial (C_{CH_4}(g)V_b)}{\partial t} = \int_{\alpha} \vec{n} \cdot (-D \phi \nabla C_{CH_4}(aq)) d\alpha$ (S3) |
| Pore-water concentration of dissolved CH <sub>4</sub> at the bubble surface (Henry's Law) | $C_{CH_4}(aq)(\alpha, t) = C_{CH_4}(g) \cdot k_H^{cc}$ (S4)                                                             |
| Bubble volume                                                                             | $V_b = \int_{\alpha} \vec{n} \cdot \vec{u} d\alpha$ (S5)                                                                |
| Pressure of gaseous CH <sub>4</sub> in the bubble                                         | $P_b = C_{CH_4}(g)RT$ (S6)                                                                                              |
| Mode I stress intensity factor (SIF) at the bubble front                                  | $K_I = \frac{E}{4(1-\nu^2)} \sqrt{\frac{\pi}{2d}} 2w_n^P$ (S7)                                                          |
| Distribution of crack increments along crack front (at fracturing)                        | $\Delta a = \Delta a_{max} \cdot \left( \frac{K_I}{K_{I_{max}}} \right)^2$ (S8)                                         |

*Note:*  $\sigma$  – Cauchy stress tensor;  $\vec{F}_g$  - gravity load;  $C_{CH_4}(aq)$  - local aqueous CH<sub>4</sub> concentration in pore waters;  $C_{CH_4}(g)$  - gaseous CH<sub>4</sub> concentration in the bubble;  $V_b$  - bubble volume;  $\phi$  - effective porosity of sediment;  $k_H^{cc}$  - dimensionless Henry's law constant defined as  $k_H \cdot R \cdot T$ , where  $k_H$  is Henry Law constant,  $R$  is gas constant,  $T$  is temperature;  $\vec{n}$  – normal vector at bubble surface,  $\alpha$ ;  $\vec{u}$  - local elastic displacement at the bubble surface;  $P_b$  - uniform gas pressure in the bubble,  $t$  - time. The parameter  $D$  is tortuosity-corrected diffusion coefficient of methane in bulk sediment, related to molecular diffusion of methane ( $D_m$ ) in free-solution, as  $D = \frac{D_m}{\tau^2}$  (Berner, 1980), with dimensionless tortuosity factor  $\tau = \sqrt{1 - 2 \ln \phi}$  (Boudreau, 1997). Also,  $\nu$  is Poisson's ratio,  $E$  is Young's modulus and  $d$  is distance of points  $P$  (modeling setup, Figure 1) prescribed on the crack surface from crack front, where  $w_n^P$  (projection of the displacement  $\vec{w}^P$ , in direction to normal to the crack surface) is calculated to determine SIF,  $K_I$ .  $K_{I_{max}}$  is maximum value of SIF,  $K_I$ , along crack font, and  $\Delta a_{max}$  is maximum crack increment along crack front, prescribed to be smaller than dimension of plastic zone near crack tip (Citarella and Crici, 2010; Katsman et al., 2013).

**Table S2:** Geochemical and mechanical parameters of sediment used in simulations (input data)

| Input Parameter | Value |
|-----------------|-------|
|-----------------|-------|

|                                                                                                                                                                             |                                                             |
|-----------------------------------------------------------------------------------------------------------------------------------------------------------------------------|-------------------------------------------------------------|
| Dissolved aqueous pore space CH <sub>4</sub> concentration ( $C_{CH_4}(aq)$ ; as at 1 m sediment depth, NRL site, Eckernförde Bay, Summer conditions, Martens et al., 1998) | 0.1 kg m <sup>-3</sup>                                      |
| Molecular diffusion coefficient of CH <sub>4</sub> in free solution ( $D_m$ ; Iversen and Jørgensen, 1993)                                                                  | 10 <sup>-9</sup> m <sup>2</sup> s <sup>-1</sup>             |
| Sediment bulk density ( $\rho$ ; Silva and Brandes, 1998)                                                                                                                   | 1240 kg m <sup>-3</sup>                                     |
| Effective porosity ( $\phi$ ; Sevee, 2010; Mitchell and Soga, 2005)                                                                                                         | 0.2                                                         |
| Young's modulus ( $E$ ; Algar and Boudreau, 2010; Barry et al., 2012; Barry et al., 2013)                                                                                   | 5.5·10 <sup>5</sup> Pa                                      |
| Poisson's ratio ( $\nu$ ; L'Esperance et al., 2013; Dorgan et al., 2007)                                                                                                    | 0.45                                                        |
| Henry's constant ( $k_H$ ; Sander, 1999)                                                                                                                                    | 9.2 · 10 <sup>-5</sup> mol m <sup>-3</sup> Pa <sup>-1</sup> |
| Temperature (T)                                                                                                                                                             | 298.15 K                                                    |

**Text S1:** Quantification of bubble expansion and contraction under oscillating pressure field

Oscillating pressure field of surface waves causes bubbles to perform periodic expansion and contraction, synchronized with wave loadings. Such motion for penny-shaped bubbles can be quantified by estimating the normal displacements at bubble's (crack) surface,  $w_n$ , which is a function of superposition of normal stresses at crack surface:

$$\Delta\sigma = P_b - \sigma_y \quad (S9)$$

where  $\sigma_y$  is an ambient compressive local stress from sediment to bubble surface,  $P_b$  is uniform inner bubble pressure. Under the uniaxial (vertical) strain boundary condition (as prescribed in present model),  $\sigma_y$  is a function of the vertical remote stress ( $\sigma_z$ ),  $\sigma_y = \frac{\nu}{1-\nu} \cdot \sigma_z$ , where  $\nu$  is Poisson's ratio (Katsman et al., 2013; Katsman 2015). Due to effect of gravity,  $\sigma_z$  rises linearly with depth and is given as,  $\sigma_z = \sigma_z^0 + \rho_s g(h_s - z)$ , where  $\rho_s$  is density of bulk sediment,  $g$  - gravity,  $h_s$  - height of modeled sediment cell above origin (located at center of bubble's initial geometry; Figure 1) and  $z$  is local vertical coordinate of the point under consideration. Therefore,  $\Delta\sigma = (P_b - \sigma_y^{con}) + \sigma_y^{lin}$ , where  $\sigma_y^{con} = \frac{\nu}{1-\nu} \cdot (\sigma_z^0 + \rho_s g h_s)$  is the constant component of  $\sigma_y$ , and  $\sigma_y^{lin} = \frac{\nu}{1-\nu} \cdot \rho_s \cdot g \cdot z$  quantifies the linear variation induced by gravity in sediment. Thus, for a 3D penny-shaped bubble, the total  $w_n$ , is obtained by superimposing displacements due to constant normal load,  $P_b - \sigma_y^{con}$ , and due to linearly varying load,  $\sigma_y^{lin}$ . Following Eq. 17 and 18 from Katsman (2015) (and also, Atroshenko, 2010),  $w_n$  can be specified as:

$$w_n(r, \theta) = 2c \frac{(1-\nu^2)}{E} \sqrt{1-r^2} \left[ \frac{(P_b - \sigma_y^{con})}{E(k)} - \frac{k^2}{(1-2k^2)E(k) - k'^2 K(k)} \cdot \frac{r a \cos \theta}{z} \sigma_y^{lin} \right] \quad (S10)$$

where  $E$  is Young's modulus;  $K(k)$ ,  $E(k)$  are complete elliptic integrals of first and second kinds, respectively;  $k'$  is ratio of semi minor axis ( $c$ ) to semi major axis ( $a$ ),  $k = \sqrt{1 - k'^2}$ ; and  $r, \theta$  denotes the non-dimensional radius and polar angle of points at the bubble surface, respectively (see, Katsman 2015). Evolution of normal displacements at bubble surface ( $w_n(r, \theta)$ ), determines the accrued stress concentration around the crack front, which is quantified in our model as Mode I stress intensity factor (SIF),  $K_I$  (Eq. S7).

**Table S3:** Input conditions used in additional simulations focused on water depth verifications (performed under a very shallow water depth (0.5 m) associated with near shore aquatic sites).

| Run no | Mean water column height, $H_{eq}$ (m) | Wave amplitude, $A$ (m) | Wave periods, $T$ (s) | Wave amplitude to water column height ratio ( $\bar{r} = A/H_{eq}$ ) | Bubble maturity time, $t_m$ (s) | $\bar{t}$ |
|--------|----------------------------------------|-------------------------|-----------------------|----------------------------------------------------------------------|---------------------------------|-----------|
| S1     | 0.5                                    | 0.22                    | 0                     | NA                                                                   | 123 sec                         | NA        |
| S2     | 0.5                                    | 0.22                    | 3                     | 0.44                                                                 | 86 sec                          | 30.08 %   |

Note: In this modelled theoretical scenario no sediment displacement by waves in the shallow water environment is assumed.

### Supplementary References:

- Algar, C. K., and Boudreau, B. P. (2010). Stability of bubbles in a linear elastic medium: Implications for bubble growth in marine sediments. *Journal of Geophysical Research* 115, F03012. <https://doi.org/10.1029/2009JF001312>
- Atroshchenko, E. (2010). Stress Intensity Factors for Elliptical and Semi - elliptical Cracks Subjected to an Arbitrary Mode I Loading. PhD thesis. The University of Waterloo, Canada.
- Barry, M. A., Johnson, B. D., and Boudreau, B. P. (2012). A new instrument for high-resolution in situ assessment of Young's modulus in shallow cohesive sediments. *Geo-Marine Letters*, 32 (4), 349-357. <https://doi.org/10.1007/s00367-012-0277-z>
- Barry, M. A., Johnson, B. D., Boudreau, B. P., Law, B. A., Page, V. S., Hill, P. S., and Wheatcroft, R. A. (2013). Sedimentary and geo-mechanical properties of Willapa Bay tidal flats. *Continental Shelf Research* 60, S198-S207. <https://doi.org/10.1016/j.csr.2012.05.007>
- Berner, R. A. (1980). *Early diagenesis: A theoretical approach*. Princeton, New Jersey: Princeton University Press.
- Boudreau, B. P. (1997). *Diagenetic models and their implementation: Modelling transport and reactions in aquatic sediments*. Berlin: Springer-Verlag.
- Citarella, R., and Cricri, G. (2010). Comparison of DBEM and FEM crack path predictions in a notched shaft under torsion. *Engineering Fracture Mechanics* 77 (11), 1730-1749. <https://doi.org/10.1016/j.engfracmech.2010.03.012>

- Dorgan, K. M., Arwade, S. R., and Jumars, P. A. (2007). Burrowing in marine muds by crack propagation: kinematics and forces. *Journal of Experimental Biology* 210 (23), 4198-4212. <https://doi.org/10.1242/jeb.010371>
- Iversen, N., and Jørgensen, B. B. (1993). Diffusion coefficients of sulfate and methane in marine sediments: Influence of porosity. *Geochimica et Cosmochimica Acta* 57 (3), 571-578. [https://doi.org/10.1016/0016-7037\(93\)90368-7](https://doi.org/10.1016/0016-7037(93)90368-7)
- Katsman, R. (2015). Correlation of shape and size of methane bubbles in fine-grained muddy aquatic sediments with sediment fracture toughness. *Journal of Structural Geology* 70, 56-64. <https://doi.org/10.1016/j.jsg.2014.11.002>
- Katsman, R., Ostrovsky, I., and Makovsky, Y. (2013). Methane bubble growth in fine-grained muddy aquatic sediment: insight from modeling. *Earth and Planetary Science Letters* 377-378, 336-346. <https://doi.org/10.1016/j.epsl.2013.07.011>
- L'Esperance, J. C., Boudreau, B. P., Barry, M. A., and Johnson, B. D. (2013). Small-scale, high-precision and high-accuracy determination of Poisson's ratios in cohesive marine sediments. *Geo-Marine Letters* 33, 75-81. <https://doi.org/10.1007/s00367-012-0305-z>
- Martens, C. S., Albert, D. B., and Alperin, M. J. (1998). Biogeochemical processes controlling methane in gassy coastal sediments—Part 1. A model coupling organic matter flux to gas production, oxidation and transport. *Continental Shelf Research* 18 (14-15), 1741-1770. [https://doi.org/10.1016/S0278-4343\(98\)00056-9](https://doi.org/10.1016/S0278-4343(98)00056-9)
- Mitchell, J. K., and Soga, K. (2005). *Fundamentals of soil behavior*, (3rd ed.). Hoboken, New Jersey: John Wiley & Sons, Inc.
- Sander, R. (1999). *Compilation of Henry's Law Constants for Inorganic and Organic Species of Potential Importance in Environmental Chemistry*, (Version 3). <http://www.henrys-law.org>, 1999.
- Sevee, J. E. (2010). Effective porosity measurement of a marine clay. *Journal of Environmental Engineering* 136 (7), 674-681. [https://doi.org/10.1061/\(ASCE\)EE.1943-7870.0000205](https://doi.org/10.1061/(ASCE)EE.1943-7870.0000205)
- Silva, A. J., and Brandes, H. G. (1998). Geotechnical properties and behavior of high-porosity, organic-rich sediments in Eckernförde Bay, Germany. *Continental Shelf Research* 18 (14-15), 1917-1938. [https://doi.org/10.1016/S0278-4343\(98\)00063-6](https://doi.org/10.1016/S0278-4343(98)00063-6)
